# Supplementary material for: miR-99a-5p Regulates the Proliferation and Differentiation of Skeletal Muscle Satellite Cells by Targeting MTMR3 in Chicken
Source: PubMed Central journal article supplement (PMC7230175; doi:10.3390/genes11040369), 2020-03-29
Supplement: genes-11-00369-s001.pdf [file genes-11-00369-s001.pdf]

# miR-99a-5p Regulates the Proliferation and Differentiation of Skeletal Muscle Satellite Cells by Targeting MTMR3 in Chicken

Xinao Cao<sup>1</sup>, Shuyue Tang<sup>1</sup>, Fei Du<sup>1</sup>, Hao Li<sup>1</sup>, Xiaoxu Shen<sup>2</sup>, Diyan Li<sup>2</sup>, Yan Wang<sup>2</sup>, Zhichao Zhang<sup>1</sup>, Lu Xia<sup>2</sup>, Qing Zhu<sup>2</sup>, Huadong Yin<sup>2\*</sup>

1 College of Animal Science and Technology, Sichuan Agricultural University, Chengdu, Sichuan 611130, PR China;

2 Farm Animal Genetic Resources Exploration and Innovation Key Laboratory of Sichuan Province, Sichuan Agricultural University, Chengdu, Sichuan 611130, PR China.

\* Correspondence: yinhuadong@sicau.edu.cn (H.Y.)

## Supplementary Figures

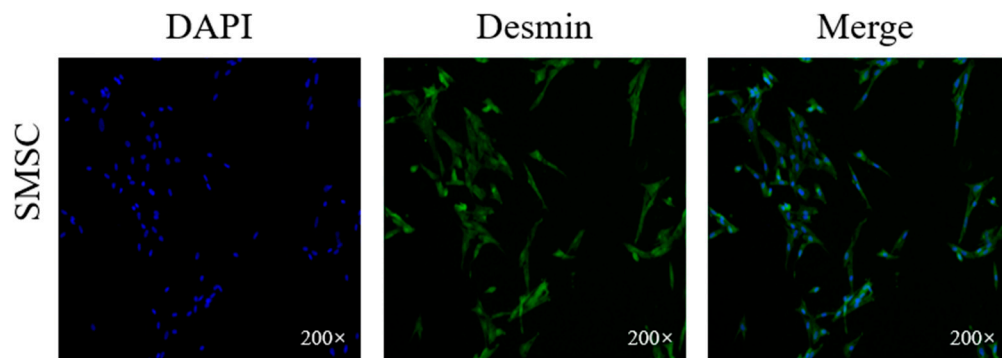

**Figure S1.** Desmin immunofluorescence staining of chicken SMSCs.

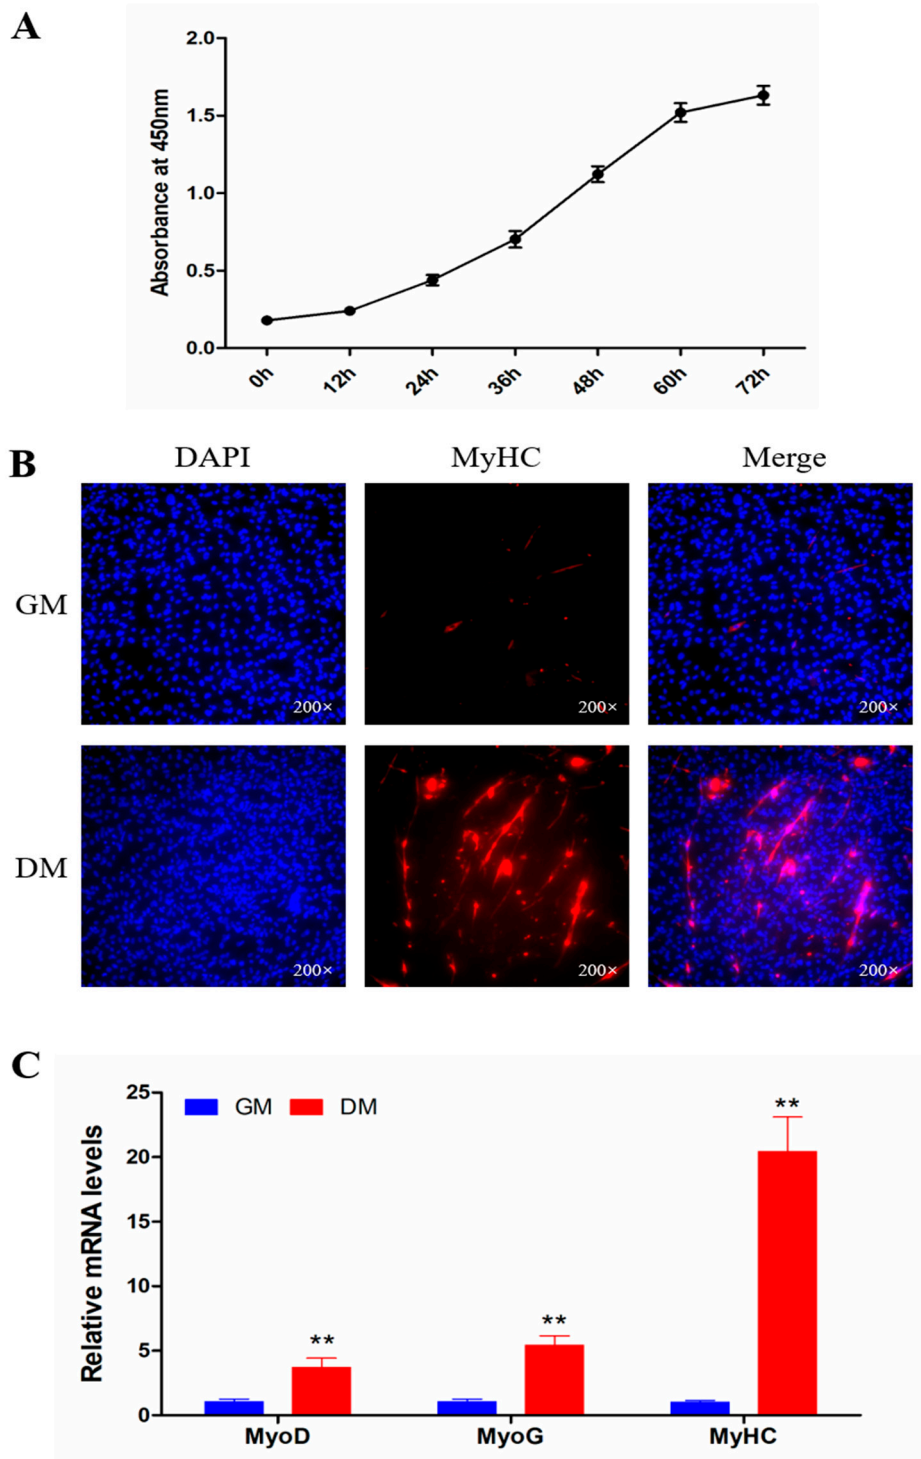

**Figure S2. (A)** CCK-8 assay results of chicken SMSCs which cultured in GM. **(B)** MyHC immunofluorescence staining of chicken SMSCs of which cultured in GM or DM. **(C)** The expression of three muscle cell differentiation marker genes in chicken SMSCs of which cultured in GM or DM.

**A**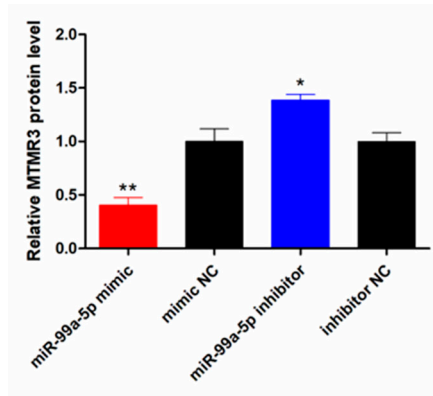**B**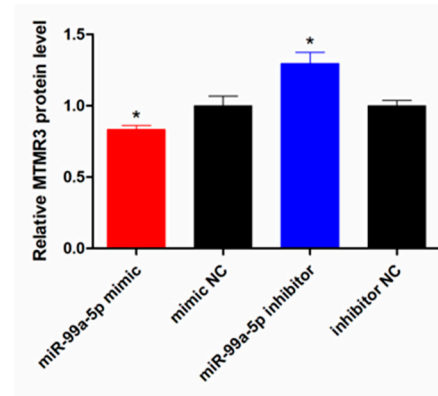

**Figure S3.** (A) The relative protein level of MTMR3 in undifferentiated SMSCs after overexpression and inhibition of miR-99a-5p. (B) The relative protein level of MTMR3 in differentiated SMSCs after overexpression and inhibition of miR-99a-5p.
